# Supplementary material
Source: PubMed Central journal article supplement (PMC4284427)
Supplement: NIHMS646931-supplement-supp.pdf [file NIHMS646931-supplement-supp.pdf]

## SUPPLEMENTAL MATERIAL

Table SI. Physiological variables of mice examined in figure 1.

| Genotypes   | Age (months) | Stimuli                    | N    | MAP (mmHg) | pCO <sub>2</sub> (mmHg) | pO <sub>2</sub> (mmHg) | pH         |
|-------------|--------------|----------------------------|------|------------|-------------------------|------------------------|------------|
| WT          | 3            | Whisker, A23187, SNAP      | 5    | 80±6       | 30.3±3.8                | 132.0±7.0              | 7.38±0.02  |
|             |              | ACh, Bradykinin, Adenosine | 5    | 81±5       | 32.9±1.0                | 129.3±14.3             | 7.36±0.03  |
|             |              | Hypercapnia                | 5    | 80±3       | 57.3±2.1*               | 132.9±8.5              | 7.17±0.02* |
|             | 18           | Whisker, A23187, SNAP      | 5    | 84±2       | 35.0±1.1                | 127.6±7.2              | 7.42±0.02  |
|             |              | ACh, Bradykinin, Adenosine | 5    | 84±2       | 34.7±1.6                | 131.8±7.5              | 7.40±0.04  |
|             |              | Hypercapnia                | 5    | 86±2       | 56.9±1.5*               | 123.1±9.0              | 7.23±0.03* |
|             | 24           | Whisker, A23187, SNAP      | 5    | 81±5       | 31.9±2.6                | 118.9±6.8              | 7.38±0.03  |
|             |              | ACh, Bradykinin, Adenosine | 5    | 80±4       | 33.2±2.6                | 124.2±5.9              | 7.35±0.02  |
| Hypercapnia |              | 5                          | 81±6 | 55.4±2.1*  | 131.0±4.2               | 7.19±0.01*             |            |
| Tg-SwDI     | 3            | Whisker, A23187, SNAP      | 5    | 83±7       | 32.4±1.7                | 126.3±7.6              | 7.39±0.04  |
|             |              | ACh, Bradykinin, Adenosine | 5    | 84±6       | 32.9±1.2                | 130.1±6.5              | 7.38±0.04  |
|             |              | Hypercapnia                | 5    | 83±7       | 56.6±1.3*               | 130.8±3.4              | 7.20±0.03* |
|             | 18           | Whisker, A23187, SNAP      | 5    | 75±5       | 27.1±1.8                | 136.8±10.9             | 7.38±0.02  |
|             |              | ACh, Bradykinin, Adenosine | 5    | 74±5       | 28.7±1.9                | 132.9±10.0             | 7.38±0.03  |
|             |              | Hypercapnia                | 5    | 73±6       | 55.2±0.3*               | 136.6±4.2              | 7.19±0.01* |
|             | 24           | Whisker, A23187, SNAP      | 5    | 72±7       | 34.3±2.6                | 126.0±3.6              | 7.39±0.04  |
|             |              | ACh, Bradykinin, Adenosine | 5    | 71±8       | 35.5±2.3                | 124.9±8.8              | 7.38±0.03  |
| Hypercapnia |              | 5                          | 68±8 | 56.5±4.5*  | 123.0±4.9               | 7.14±0.01*             |            |

Mean±SEM; \*p&lt;0.05 vs normocapnia

Table SII. Physiological variables of mice examined in figure 4.

| Genotypes | Treatment | Age (months) | Stimuli                    | N | MAP (mmHg) | pCO <sub>2</sub> (mmHg) | pO <sub>2</sub> (mmHg) | pH         |
|-----------|-----------|--------------|----------------------------|---|------------|-------------------------|------------------------|------------|
| WT        | Vehicle   | 3            | Whisker, A23187, Adenosine | 6 | 84±5       | 33.9±2.0                | 131.5±10.0             | 7.38±0.02  |
|           |           |              | Hypercapnia                | 6 | 84±5       | 55.7±2.0*               | 131.4±6.3              | 7.19±0.03* |
|           | MnTBAP    |              | Whisker, A23187, Adenosine | 6 | 84±4       | 32.9±1.5                | 130.9±9.6              | 7.37±0.02  |
|           |           |              | Hypercapnia                | 6 | 83±2       | 55.2±1.2*               | 128.7±9.9              | 7.20±0.02* |
|           | Vehicle   | 18           | Whisker, A23187, Adenosine | 6 | 81±3       | 33.7±0.9                | 133.4±8.1              | 7.38±0.02  |
|           |           |              | Hypercapnia                | 6 | 80±2       | 56.7±1.2*               | 131.5±6.6              | 7.21±0.01* |
|           | MnTBAP    |              | Whisker, A23187, Adenosine | 6 | 82±1       | 35.1±1.4                | 128.1±5.9              | 7.39±0.03  |
|           |           |              | Hypercapnia                | 6 | 82±1       | 57.6±2.9*               | 128.4±5.5              | 7.22±0.02* |
| Tg-SwDI   | Vehicle   | 3            | Whisker, A23187, Adenosine | 5 | 83±1       | 36.5±2.2                | 129.9±10.6             | 7.38±0.01  |
|           |           |              | Hypercapnia                | 5 | 82±1       | 54.6±1.7*               | 133.2±3.1              | 7.23±0.02* |
|           | MnTBAP    |              | Whisker, A23187, Adenosine | 5 | 83±1       | 34.4±1.2                | 134.4±2.8              | 7.38±0.01  |
|           |           |              | Hypercapnia                | 5 | 83±1       | 52.6±2.1*               | 136.7±9.0              | 7.22±0.02* |
|           | Vehicle   | 18           | Whisker, A23187, Adenosine | 5 | 81±1       | 34.4±1.1                | 135.9±5.3              | 7.39±0.01  |
|           |           |              | Hypercapnia                | 5 | 80±1       | 55.0±2.2*               | 125.7±6.8              | 7.20±0.02* |
|           | MnTBAP    |              | Whisker, A23187, Adenosine | 5 | 80±1       | 35.6±1.8                | 128.5±6.1              | 7.38±0.02  |
|           |           |              | Hypercapnia                | 5 | 80±1       | 55.2±1.7*               | 129.2±11.4             | 7.22±0.02* |

Mean±SEM; \*p&lt;0.05 vs normocapnia
